# Supplementary material for: Strain-Enhanced Thermoelectric Performance in GeS2 Monolayer
Source: MDPI journal article supplement (doi:10.3390/ma15114016), 2022-06-06
Supplement: s1 [file s1]

**Strain-enhanced thermoelectric performance in GeS<sub>2</sub> monolayer**

**Xinying Ruan<sup>1,†</sup>, Rui Xiong<sup>1,†</sup>, Zhou Cui<sup>1</sup>, Cuilian Wen<sup>1</sup>, Jiang-Jiang Ma<sup>2,3</sup>, Bao-Tian Wang<sup>2,3,4,\*</sup>, and**

**Baisheng Sa<sup>1,\*</sup>**

<sup>1</sup> Key Laboratory of Eco-materials Advanced Technology, College of Materials Science and Engineering, Fuzhou University, Fuzhou 350100, P. R. China

<sup>2</sup> Institute of High Energy Physics, Chinese Academy of Sciences (CAS), Beijing 100049, P. R. China

<sup>3</sup> Spallation Neutron Source Science Center (SNSC), Dongguan 523803, P. R. China

<sup>4</sup> Collaborative Innovation Center of Extreme Optics, Shanxi University, Taiyuan 030006, P. R. China

\* Correspondence: wangbt@ihep.ac.cn (B. Wang); bssa@fzu.edu.cn (B. Sa)

† These authors equally contributed to this work.

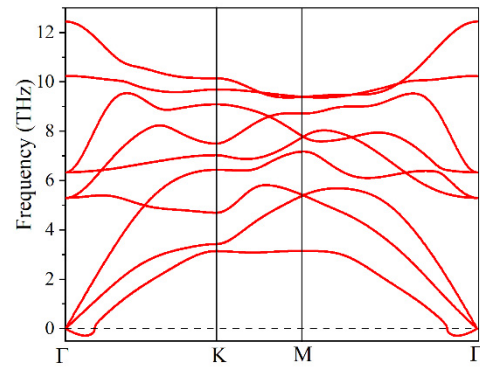

Figure S1. The phonon spectrum of GeS<sub>2</sub> under 2% compressive strain.

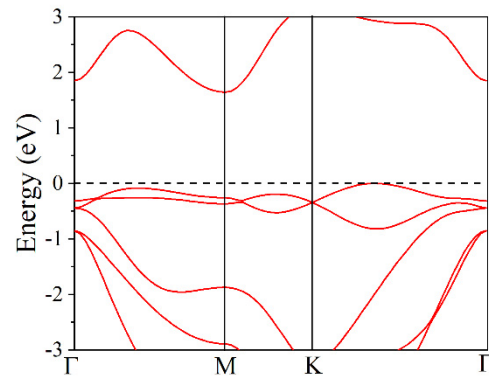

Figure S2. The band structure of GeS<sub>2</sub> monolayer under 8% tensile strain.

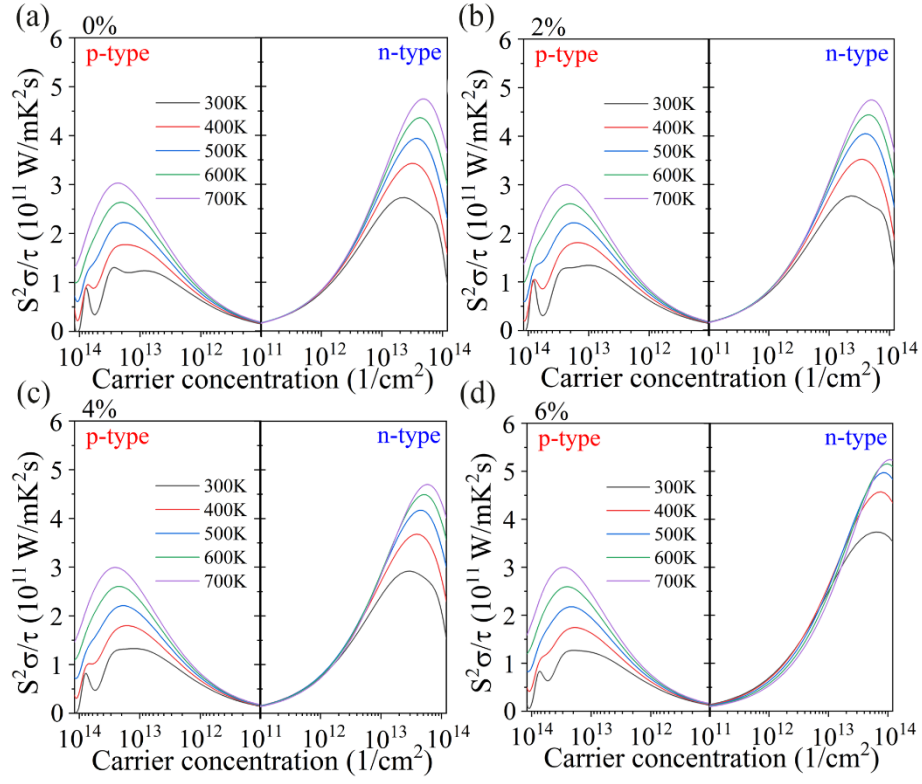

Figure S3. The power factor of GeS<sub>2</sub> monolayer as a function of carrier concentrations under different tensile strains.

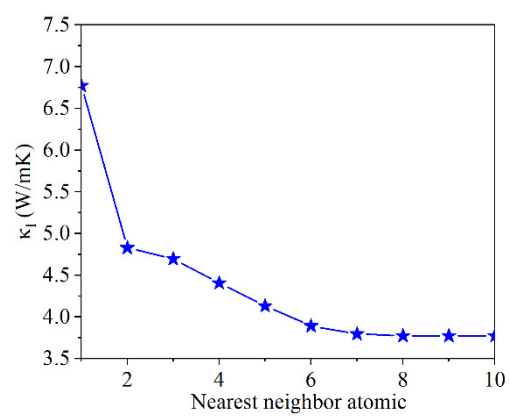

Figure S4. The lattice thermal conductivity of GeS<sub>2</sub> monolayer as a function of the nearest neighbor atomic.

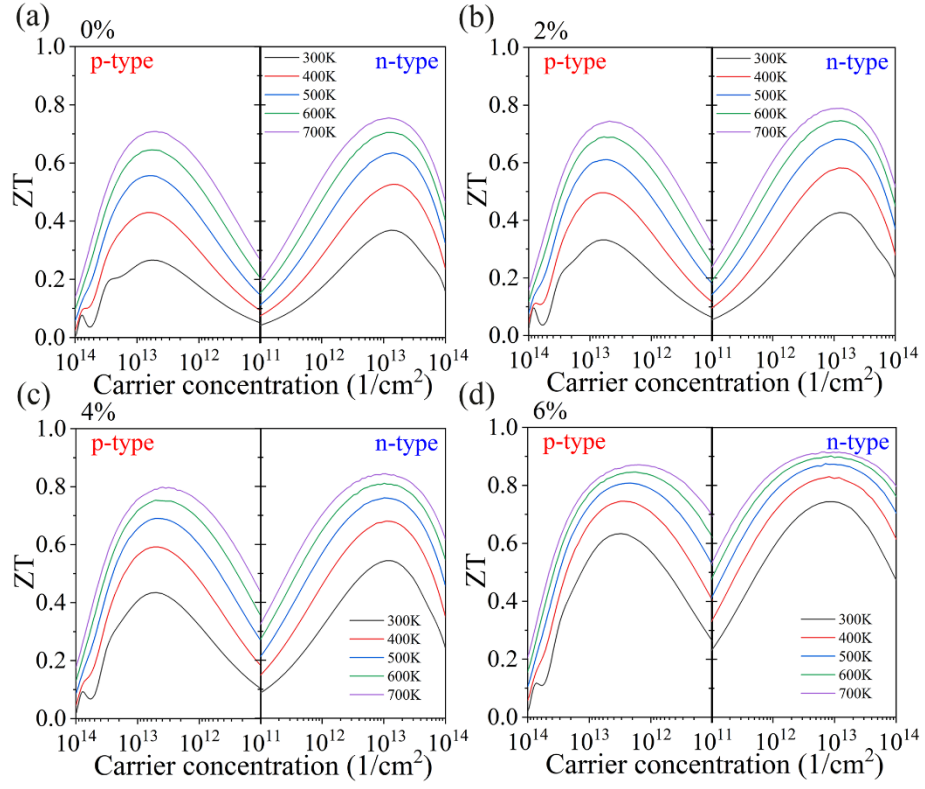

Figure S5. The figure of merit  $ZT$  of  $\text{GeS}_2$  monolayer as a function of carrier concentrations under different tensile strains.

Table S1. The calculated parameters for effective mass of the GeS<sub>2</sub> monolayer, the number of band for quadratic function fitting ( $N_b$ ),  $k$ -cutoff, band extrema points ( $B_p$ ), fitting points ( $F_p$ )

| Effective mass type | $N_b$ | $k$ -cutoff ( $1/\text{\AA}$ ) | $B_p$ | $F_p$ |
|---------------------|-------|--------------------------------|-------|-------|
| e                   | 27    | 0.015                          | 1     | 6     |
| h                   | 26    | 0.015                          | 11    | 6     |
